# Supplementary material for: A Comparison of Gene Expression Profiles of Rat Tissues after Mild and Short-Term Calorie Restrictions
Source: MDPI journal article supplement (doi:10.3390/nu13072277), 2021-06-30
Supplement: s1 [file s1]

**Supplementary Table 2** GO analysis of the genes up-regulated by 30%CR

|                         | GO ID          | GO Term (BP_Direct)                                    | p-value  |
|-------------------------|----------------|--------------------------------------------------------|----------|
| liver                   | GO:0055114     | oxidation-reduction process                            | 8.65E-13 |
|                         | GO:0006635     | fatty acid beta-oxidation                              | 1.39E-06 |
|                         | GO:0017144     | drug metabolic process                                 | 1.68E-04 |
| adipose                 | GO:0055114     | oxidation-reduction process                            | 1.08E-22 |
|                         | GO:0006099     | tricarboxylic acid cycle                               | 1.63E-13 |
|                         | GO:0006635     | fatty acid beta-oxidation                              | 1.10E-11 |
|                         | GO:0033539     | fatty acid beta-oxidation using acyl-CoA dehydrogenase | 1.11E-06 |
|                         | GO:0055088     | lipid homeostasis                                      | 7.19E-05 |
|                         | GO:0006629     | lipid metabolic process                                | 1.21E-04 |
|                         | GO:0008152     | metabolic process                                      | 2.72E-04 |
| muscle                  | not identified |                                                        |          |
|                         |                |                                                        |          |
| brain<br>(hypothalamus) | not identified |                                                        |          |
| intestin                | GO:0007568     | aging                                                  |          |

Adjusted p- value < 1×10<sup>-4</sup> (Fisher's exact test)

**Supplementary Table 3** GO analysis of the genes down-regulated by 30%CR

|                         | GO ID          | GO Term (BP_Direct)                                                               | p-value  |
|-------------------------|----------------|-----------------------------------------------------------------------------------|----------|
| liver                   | GO:0006695     | cholesterol biosynthetic process                                                  | 8.90E-12 |
|                         | GO:0006629     | lipid metabolic process                                                           | 4.03E-05 |
|                         | GO:0042493     | response to drug                                                                  | 8.05E-04 |
|                         | GO:0016126     | sterol biosynthetic process                                                       | 8.05E-04 |
|                         | GO:0055114     | oxidation-reduction process                                                       | 8.05E-04 |
| adipose                 | GO:0098609     | cell-cell adhesion                                                                | 2.49E-12 |
|                         | GO:0019886     | antigen processing and presentation of exogenous peptide antigen via MHC class II | 9.61E-05 |
|                         | GO:0001525     | angiogenesis                                                                      | 9.61E-05 |
|                         | GO:0042493     | response to drug                                                                  | 9.61E-05 |
|                         | GO:0016064     | immunoglobulin mediated immune response                                           | 9.61E-05 |
|                         | GO:0071260     | cellular response to mechanical stimulus                                          | 9.61E-05 |
|                         | GO:0043066     | negative regulation of apoptotic process                                          | 9.61E-05 |
|                         | GO:0043123     | positive regulation of I-kappaB kinase/NF-kappaB signaling                        | 1.56E-04 |
|                         | GO:0030036     | actin cytoskeleton organization                                                   | 2.99E-04 |
|                         | GO:0071407     | cellular response to organic cyclic compound                                      | 4.88E-04 |
|                         | GO:0008360     | regulation of cell shape                                                          | 6.83E-04 |
|                         | GO:0045087     | innate immune response                                                            | 8.53E-04 |
|                         | GO:0001666     | response to hypoxia                                                               | 1.29E-04 |
|                         | GO:0006936     | muscle contraction                                                                | 3.50E-04 |
|                         | GO:0030036     | actin cytoskeleton organization                                                   | 5.90E-04 |
| muscle                  |                |                                                                                   |          |
|                         |                |                                                                                   |          |
| brain<br>(hypothalamus) | not identified |                                                                                   |          |
| intestin                | not identified |                                                                                   |          |

Adjusted p- value < 1×10<sup>-4</sup> (Fisher's exact test)
