# Supplementary material for: A Comparison of Gene Expression Profiles of Rat Tissues after Mild and Short-Term Calorie Restrictions
Source: MDPI journal article supplement (doi:10.3390/nu13072277), 2021-06-30
Supplement: s1 [file s1]

**Supplementary Table 5** Reported meta-analysis of CR transcriptome experiment

|                    | Ref #1                                                                                                                                                                                 | Ref #2                                                                                                                                                                                                                                  |
|--------------------|----------------------------------------------------------------------------------------------------------------------------------------------------------------------------------------|-----------------------------------------------------------------------------------------------------------------------------------------------------------------------------------------------------------------------------------------|
| Reference          | William R Swindell<br>BMC Genomics. 2009                                                                                                                                               | Michael Plank et. al.<br>Mol Biosyst. 2012                                                                                                                                                                                              |
| # of studies       | 33                                                                                                                                                                                     | 61                                                                                                                                                                                                                                      |
| Organisms          | mouse                                                                                                                                                                                  | mouse, rat, pig                                                                                                                                                                                                                         |
| Organs and tissues | Liver, Heart, Muscle, White Adipose Tissue,<br>Hippocampus, Cortex, Hypothalamus, Cerebellum,<br>Kidney, Lung, Thymus, Spinal Cord, Striatum,<br>Cochlea, Gonads, Mammary Gland, Colon | Liver, Skeletal Muscle, Cochlea, Thymus, Kidney, Heart,<br>Mammary Gland, Testis, Ovary, Lung, Adipose tissue,<br>Neocortex, Forebrain, Gastrocnemius, Cerebellum,<br>Hippocampus, SpinalCord, Striatum, Cortex, Colon,<br>Hypothalamus |
| CR level           | 26 - 66%                                                                                                                                                                               | between 10 and 40% (in most cases)                                                                                                                                                                                                      |
| CR duration        | 1 - 31 month                                                                                                                                                                           | within one day - 23.5 month                                                                                                                                                                                                             |
