# Supplementary material for: A Comparison of Gene Expression Profiles of Rat Tissues after Mild and Short-Term Calorie Restrictions
Source: MDPI journal article supplement (doi:10.3390/nu13072277), 2021-06-30
Supplement: s1 [file s1]

**SupplementaryTable 4** Genes comonly altered by CR

| Up-regulated across all tissues                                                                                        | # of overlapped gene probes | Down-regulated across all tissues                                                                                                                                                                                                                                                                                                               | # of overlapped gene probes |
|------------------------------------------------------------------------------------------------------------------------|-----------------------------|-------------------------------------------------------------------------------------------------------------------------------------------------------------------------------------------------------------------------------------------------------------------------------------------------------------------------------------------------|-----------------------------|
| nuclear receptor subfamily 1, group D, member 2                                                                        | 29                          | CKLF-like MARVEL transmembrane domain containing 6                                                                                                                                                                                                                                                                                              | 25                          |
| aldo-keto reductase family 1, member C14                                                                               | 21                          | cytochrome P450, family 51                                                                                                                                                                                                                                                                                                                      | 23                          |
| nicotinamide phosphoribosyltransferase                                                                                 | 21                          | heat shock protein 90, alpha (cytosolic), class A member 1 /// heat shock protein HSP 90-alpha /// similar to heat shock protein 1, alpha                                                                                                                                                                                                       | 21                          |
| glutamate-ammonia ligase                                                                                               | 20                          | actin, gamma 1 /// actin, gamma 1 propeptide-like /// POTE ankyrin domain family, member F                                                                                                                                                                                                                                                      | 20                          |
| sulfotransferase family 1A member 1                                                                                    | 20                          | fatty acid desaturase 1                                                                                                                                                                                                                                                                                                                         | 19                          |
| glutamate-ammonia ligase                                                                                               | 20                          | tubulin, beta 4B class IVb                                                                                                                                                                                                                                                                                                                      | 19                          |
| CD36 molecule (thrombospondin receptor) /// scavenger receptor class B, member 2-like /// platelet glycoprotein 4-like | 20                          | tropomyosin 4                                                                                                                                                                                                                                                                                                                                   | 19                          |
| flavin containing monooxygenase 1                                                                                      | 20                          | sphingosine-1-phosphate receptor 1                                                                                                                                                                                                                                                                                                              | 19                          |
| epoxide hydrolase 1, microsomal (xenobiotic)                                                                           | 20                          | tubulin, beta 2A class IIa                                                                                                                                                                                                                                                                                                                      | 19                          |
| D site of albumin promoter (albumin D-box) binding protein                                                             | 20                          | regulator of calcineurin 1                                                                                                                                                                                                                                                                                                                      | 19                          |
| nuclear receptor subfamily 1, group D, member 2                                                                        | 19                          | clock circadian regulator                                                                                                                                                                                                                                                                                                                       | 19                          |
| retinol saturase (all trans retinol 13,14 reductase)                                                                   | 19                          | tubulin alpha-1C chain-like /// tubulin, alpha 1A /// tubulin, alpha 1B /// tubulin, alpha 1C                                                                                                                                                                                                                                                   | 18                          |
| Sad1 and UNC84 domain containing 2                                                                                     | 19                          | Fc fragment of IgG, low affinity IIa, receptor /// Low affinity immunoglobulin gamma Fc region receptor III-like /// low affinity immunoglobulin gamma Fc region receptor III-like /// low affinity immunoglobulin gamma Fc region receptor III /// low affinity immunoglobulin gamma Fc region receptor III-like /// Fc gamma receptor II beta | 18                          |
| patatin-like phospholipase domain containing 7                                                                         | 19                          | 7-dehydrocholesterol reductase                                                                                                                                                                                                                                                                                                                  | 18                          |
| ubiquitin specific peptidase 2                                                                                         | 19                          | transmembrane protein 97                                                                                                                                                                                                                                                                                                                        | 18                          |
| xanthine dehydrogenase                                                                                                 | 18                          | early growth response 1                                                                                                                                                                                                                                                                                                                         | 17                          |
| PTEN induced putative kinase 1                                                                                         | 18                          | tubulin, alpha 4A                                                                                                                                                                                                                                                                                                                               | 17                          |
| sphingomyelin synthase 1                                                                                               | 18                          | serine/arginine-rich splicing factor 3                                                                                                                                                                                                                                                                                                          | 17                          |
| enoyl CoA hydratase 1, peroxisomal                                                                                     | 18                          | glycine amidinotransferase (L-arginine:glycine amidinotransferase)                                                                                                                                                                                                                                                                              | 16                          |
| carnitine palmitoyltransferase 1a, liver                                                                               | 18                          | isopentenyl-diphosphate delta isomerase 1                                                                                                                                                                                                                                                                                                       | 16                          |
| P450 (cytochrome) oxidoreductase                                                                                       | 18                          | cysteine and glycine-rich protein 1                                                                                                                                                                                                                                                                                                             | 16                          |
| BCL2/adenovirus E1B interacting protein 3                                                                              | 18                          | spermidine/spermine N1-acetyl transferase 1                                                                                                                                                                                                                                                                                                     | 16                          |
| glutamate-ammonia ligase                                                                                               | 17                          | perilipin 2                                                                                                                                                                                                                                                                                                                                     | 16                          |
| CD36 molecule (thrombospondin receptor) /// scavenger receptor class B, member 2-like                                  | 17                          | proline rich 13                                                                                                                                                                                                                                                                                                                                 | 16                          |
| 2,4-dienoyl CoA reductase 1, mitochondrial                                                                             | 17                          | transferrin receptor                                                                                                                                                                                                                                                                                                                            | 16                          |
| Kruppel-like factor 15                                                                                                 | 17                          | nuclear receptor subfamily 4, group A, member 3                                                                                                                                                                                                                                                                                                 | 15                          |
| Kruppel-like factor 9                                                                                                  | 17                          | sterol regulatory element binding transcription factor 1                                                                                                                                                                                                                                                                                        | 15                          |
| G protein-coupled receptor 146                                                                                         | 17                          | low density lipoprotein receptor                                                                                                                                                                                                                                                                                                                | 15                          |
| homocysteine-inducible, endoplasmic reticulum stress-inducible, ubiquitin-like domain member 1                         | 16                          | sterol regulatory element binding transcription factor 1                                                                                                                                                                                                                                                                                        | 15                          |
| P450 (cytochrome) oxidoreductase                                                                                       | 16                          | heat shock 105/110 protein 1                                                                                                                                                                                                                                                                                                                    | 15                          |
| aldo-keto reductase family 1, member C14                                                                               | 16                          | transmembrane protein 140                                                                                                                                                                                                                                                                                                                       | 15                          |
| diacylglycerol O-acyltransferase 2                                                                                     | 16                          | Fc fragment of IgG, low affinity IIa, receptor /// low affinity immunoglobulin gamma Fc region receptor III-like /// low affinity immunoglobulin gamma Fc region receptor III /// low affinity immunoglobulin gamma Fc region receptor III-like /// Fc gamma receptor II beta                                                                   | 15                          |
| perilipin 4                                                                                                            | 16                          | glutaredoxin (thioltransferase)                                                                                                                                                                                                                                                                                                                 | 14                          |
| eukaryotic translation initiation factor 4E binding protein 1                                                          | 16                          | insulin induced gene 1                                                                                                                                                                                                                                                                                                                          | 14                          |
| guanine deaminase                                                                                                      | 16                          | methylsterol monooxygenase 1                                                                                                                                                                                                                                                                                                                    | 14                          |
| matrix Gla protein                                                                                                     | 15                          | dynein light chain LC8-type 1                                                                                                                                                                                                                                                                                                                   | 14                          |
| aldehyde dehydrogenase 3 family, member A2                                                                             | 15                          | cofilin 1, non-muscle                                                                                                                                                                                                                                                                                                                           | 14                          |
| methyltransferase like 7A                                                                                              | 15                          | signal transducer and activator of transcription 3 (acute-phase response factor)                                                                                                                                                                                                                                                                | 14                          |
| GABA(A) receptor-associated protein like 1                                                                             | 15                          | signal peptidase complex subunit 3                                                                                                                                                                                                                                                                                                              | 14                          |
| sideroflexin 1                                                                                                         | 15                          | heat shock protein 90, alpha (cytosolic), class A member 1 /// heat shock protein 1, alpha-like /// heat shock protein HSP 90-alpha                                                                                                                                                                                                             | 14                          |
| indolethylamine N-methyltransferase                                                                                    | 15                          | interferon regulatory factor 2 binding protein 2                                                                                                                                                                                                                                                                                                | 14                          |
| oxysterol binding protein-like 11                                                                                      | 15                          | sigma non-opioid intracellular receptor 1                                                                                                                                                                                                                                                                                                       | 14                          |
| metallothionein 2A                                                                                                     | 15                          | BTG family, member 2                                                                                                                                                                                                                                                                                                                            | 14                          |
| glycerophosphodiester phosphodiesterase 1                                                                              | 15                          | cytoplasmic polyadenylation element binding protein 2                                                                                                                                                                                                                                                                                           | 14                          |
| glycogen synthase 2                                                                                                    | 14                          | matrix metalloproteinase 14 (membrane-inserted)                                                                                                                                                                                                                                                                                                 | 13                          |
| sorbitol dehydrogenase                                                                                                 | 14                          | calmodulin 1                                                                                                                                                                                                                                                                                                                                    | 13                          |
| hydroxyacyl-CoA dehydrogenase/3-ketoacyl-CoA thiolase/enoyl-CoA hydratase (trifunctional protein), alpha subunit       | 14                          | calmodulin 1                                                                                                                                                                                                                                                                                                                                    | 13                          |

|                                                                                                                                             |    |                                                                                                                        |    |
|---------------------------------------------------------------------------------------------------------------------------------------------|----|------------------------------------------------------------------------------------------------------------------------|----|
| cytochrome P450, family 2, subfamily b, polypeptide 1 ///<br>cytochrome P450, family 2, subfamily b, polypeptide 2                          | 14 | lysozyme 2                                                                                                             | 13 |
| metallothionein 1a /// transthyretin                                                                                                        | 14 | malic enzyme 1, NADP(+)-dependent, cytosolic                                                                           | 13 |
| patatin-like phospholipase domain-containing protein 2-like ///<br>patatin-like phospholipase domain containing 2                           | 14 | WD repeat and SOCS box-containing 1                                                                                    | 13 |
| tetraspanin-4-like /// tetraspanin 4                                                                                                        | 14 | glutaredoxin (thioltransferase)                                                                                        | 13 |
| pleckstrin homology-like domain, family A, member 3                                                                                         | 14 | BTG family, member 2                                                                                                   | 13 |
| sorbin and SH3 domain containing 1                                                                                                          | 14 | UDP-Gal:betaGlcNAc beta 1,4-galactosyltransferase, polypeptide 6                                                       | 13 |
| cordón-bleu WH2 repeat protein-like 1                                                                                                       | 14 | exportin 1                                                                                                             | 13 |
| phytanoyl-CoA 2-hydroxylase                                                                                                                 | 14 | G0/G1switch 2                                                                                                          | 13 |
| phosphoinositide-3-kinase interacting protein 1                                                                                             | 14 | dual-specificity tyrosine-(Y)-phosphorylation regulated kinase 2                                                       | 13 |
| FK506 binding protein 5                                                                                                                     | 14 | actin, beta                                                                                                            | 13 |
| aconitase 2, mitochondrial                                                                                                                  | 13 | B-cell translocation gene 1, anti-proliferative                                                                        | 12 |
| enoyl-CoA delta isomerase 1                                                                                                                 | 13 | farnesyl diphosphate synthase                                                                                          | 12 |
| microtubule-associated protein 1 light chain 3 beta                                                                                         | 13 | fatty acid synthase                                                                                                    | 12 |
| selenium-binding protein 1 /// selenium binding protein 1                                                                                   | 13 | clusterin                                                                                                              | 12 |
| glutathione S-transferase alpha 1 /// glutathione S-transferase alpha-<br>3-like                                                            | 13 | HOP homeobox                                                                                                           | 12 |
| nuclear protein, transcriptional regulator, 1 /// nuclear protein,<br>transcriptional regulator, 1                                          | 13 | malic enzyme 1, NADP(+)-dependent, cytosolic                                                                           | 12 |
| mitochondrial amidoxime reducing component 2                                                                                                | 13 | collagen, type I, alpha 2 /// collagen, type I, alpha 2                                                                | 12 |
| enoyl-CoA, hydratase/3-hydroxyacyl CoA dehydrogenase                                                                                        | 13 | transformer 2 beta homolog (Drosophila)                                                                                | 12 |
| pyruvate dehydrogenase kinase, isozyme 4                                                                                                    | 13 | heat shock protein 5                                                                                                   | 12 |
| protein tyrosine phosphatase 4a1-like /// protein tyrosine<br>phosphatase type IVA 1 /// protein tyrosine phosphatase type IVA,<br>member 1 | 13 | proline-rich nuclear receptor coactivator 1                                                                            | 12 |
| solute carrier family 38, member 3                                                                                                          | 13 | ARP3 actin-related protein 3 homolog (yeast)                                                                           | 12 |
| starch binding domain 1                                                                                                                     | 13 | related RAS viral (r-ras) oncogene homolog 2                                                                           | 12 |
| yippee-like 3                                                                                                                               | 13 | glycerol-3-phosphate acyltransferase, mitochondrial                                                                    | 12 |
| vascular endothelial growth factor A                                                                                                        | 13 | vasodilator-stimulated phosphoprotein                                                                                  | 12 |
| arrestin domain containing 3                                                                                                                | 13 | myristoylated alanine rich protein kinase C substrate                                                                  | 12 |
| myosin regulatory light chain interacting protein                                                                                           | 13 | Tnf receptor-associated factor 3                                                                                       | 12 |
| uncharacterized LOC100910069 /// uncharacterized LOC102554001<br>/// similar to NS1-associated protein 1 isoform 2                          | 13 | phosphodiesterase 4B, cAMP specific                                                                                    | 12 |
| hydroxyacyl-CoA dehydrogenase/3-ketoacyl-CoA thiolase/enoyl-<br>CoA hydratase (trifunctional protein), beta subunit                         | 12 | myristoylated alanine rich protein kinase C substrate                                                                  | 12 |
| Pim-3 proto-oncogene, serine/threonine kinase                                                                                               | 12 | actin related protein 2/3 complex, subunit 5-like                                                                      | 12 |
| carnitine palmitoyltransferase 1a, liver                                                                                                    | 12 | tetratricopeptide repeat domain 7A                                                                                     | 12 |
| flavin containing monooxygenase 3                                                                                                           | 12 | cysteine-rich with EGF-like domains 2                                                                                  | 12 |
| basic helix-loop-helix family, member e41                                                                                                   | 12 | CD164 molecule, sialomucin                                                                                             | 12 |
| sorbitol dehydrogenase                                                                                                                      | 12 | carbonic anhydrase 2                                                                                                   | 12 |
| glutamate cysteine ligase, modifier subunit                                                                                                 | 12 | solute carrier family 16 (monocarboxylate transporter), member 1                                                       | 12 |
| 2-hydroxyacyl-CoA lyase 1                                                                                                                   | 12 | cytochrome P450, family 51                                                                                             | 12 |
| ankyrin repeat and KH domain containing 1 /// eukaryotic<br>translation initiation factor 4E binding protein 3                              | 12 | transmembrane protein 263                                                                                              | 12 |
| hydroxysteroid (17-beta) dehydrogenase 11                                                                                                   | 12 | COMM domain containing 6                                                                                               | 12 |
| cell growth regulator with ring finger domain 1                                                                                             | 12 | transmembrane protein 100                                                                                              | 12 |
| UDP-glucose pyrophosphorylase 2                                                                                                             | 12 | perilipin 2                                                                                                            | 12 |
| complement factor D (adipsin)                                                                                                               | 12 | CD44 molecule (Indian blood group)                                                                                     | 12 |
| zinc finger protein 709-like                                                                                                                | 12 | lactate dehydrogenase A                                                                                                | 11 |
| sulfatase 2                                                                                                                                 | 12 | stearoyl-Coenzyme A desaturase 2                                                                                       | 11 |
| Rho-related BTB domain containing 1                                                                                                         | 12 | high mobility group box 2 /// high mobility group box 2-like 1 ///<br>similar to High mobility group protein 2 (HMG-2) | 11 |
| uracil-DNA glycosylase                                                                                                                      | 12 | ATP citrate lyase                                                                                                      | 11 |
| Cbp/p300-interacting transactivator, with Glu/Asp-rich carboxy-<br>terminal domain, 2                                                       | 11 | adenosylmethionine decarboxylase 1                                                                                     | 11 |
| alpha-methylacyl-CoA racemase                                                                                                               | 11 | Kirsten rat sarcoma viral oncogene                                                                                     | 11 |
| nuclear factor, erythroid 2-like 2                                                                                                          | 11 | ornithine decarboxylase 1                                                                                              | 11 |
| ribonuclease, RNase A family 4                                                                                                              | 11 | tropomyosin 3                                                                                                          | 11 |
| 6-phosphofructo-2-kinase/fructose-2,6-bisphosphatase 1                                                                                      | 11 | myristoylated alanine rich protein kinase C substrate                                                                  | 11 |
| solute carrier family 25 (mitochondrial carrier; dicarboxylate<br>transporter), member 10                                                   | 11 | serpin peptidase inhibitor, clade H (heat shock protein 47), member 1,<br>(collagen binding protein 1)                 | 11 |
| cytochrome P450, family 4, subfamily b, polypeptide 1                                                                                       | 11 | adiponectin receptor 2                                                                                                 | 11 |
| spectrin, beta, non-erythrocytic 1                                                                                                          | 11 | serine/arginine-rich splicing factor 2                                                                                 | 11 |
| RNA binding motif (RNP1, RRM) protein 3                                                                                                     | 11 | tripartite motif-containing 5                                                                                          | 11 |
| similar to RIKEN cDNA 4931406C07                                                                                                            | 11 | protein kinase domain containing, cytoplasmic                                                                          | 11 |
| methionine sulfoxide reductase B1                                                                                                           | 11 | immunoglobulin heavy chain, alpha /// similar to immunoglobulin<br>heavy chain                                         | 11 |
| gap junction protein, alpha 1                                                                                                               | 11 | similar to hypothetical protein A530094D01                                                                             | 11 |
| patatin-like phospholipase domain containing 8                                                                                              | 11 | heat shock protein 90 alpha (cytosolic), class B member 1                                                              | 11 |

|                                                                                               |    |                                                                  |    |
|-----------------------------------------------------------------------------------------------|----|------------------------------------------------------------------|----|
| procollagen C-endopeptidase enhancer 2                                                        | 11 | v-maf avian musculoaponeurotic fibrosarcoma oncogene homolog     | 11 |
| mitochondrial amidoxime reducing component 1                                                  | 11 | transketolase                                                    | 11 |
| dual specificity phosphatase 6                                                                | 11 | tubulin, beta 5 class I                                          | 11 |
| angiotensin II receptor, type 1a                                                              | 11 | phosphatidylinositol-5-phosphate 4-kinase, type II, alpha        | 11 |
| carnitine palmitoyltransferase 2                                                              | 11 | FK506 binding protein 4                                          | 11 |
| acyl-CoA synthetase long-chain family member 4                                                | 11 | bone marrow stromal cell antigen 2                               | 11 |
| osteomodulin /// osteomodulin                                                                 | 11 | akirin 1                                                         | 11 |
| acetyl-CoA acyltransferase 1A /// acetyl-Coenzyme A acyltransferase 1B                        | 11 | DnaJ (Hsp40) homolog, subfamily A, member 1                      | 11 |
| Fc fragment of IgG, receptor, transporter, alpha                                              | 11 | core-binding factor, beta subunit                                | 11 |
| prostaglandin reductase 1                                                                     | 11 | profilin 1                                                       | 10 |
| zinc binding alcohol dehydrogenase, domain containing 2                                       | 11 | syndecan 4                                                       | 10 |
| solute carrier family 25 (carnitine/acylcarnitine translocase), member 20                     | 11 | carbonic anhydrase 2                                             | 10 |
| malonyl-CoA decarboxylase                                                                     | 10 | ADP-ribosylation factor 5                                        | 10 |
| receptor (G protein-coupled) activity modifying protein 2                                     | 10 | interferon-related developmental regulator 1                     | 10 |
| cytochrome P450, family 2, subfamily e, polypeptide 1                                         | 10 | 3-hydroxy-3-methylglutaryl-CoA synthase 1 (soluble)              | 10 |
| adenylate kinase 3                                                                            | 10 | CAP, adenylate cyclase-associated protein 1 (yeast)              | 10 |
| ectonucleotide pyrophosphatase/phosphodiesterase 2                                            | 10 | caldesmon 1                                                      | 10 |
| phosphodiesterase 3B, cGMP-inhibited                                                          | 10 | tropomyosin 4                                                    | 10 |
| coagulation factor III (thromboplastin, tissue factor)                                        | 10 | transmembrane protein 176B                                       | 10 |
| isocitrate dehydrogenase 1 (NADP+), soluble                                                   | 10 | argonaute RISC catalytic component 2                             | 10 |
| lactate dehydrogenase B                                                                       | 10 | inhibitor of DNA binding 2                                       | 10 |
| peripheral myelin protein 22                                                                  | 10 | cAMP responsive element modulator                                | 10 |
| 3-hydroxy-3-methylglutaryl-CoA synthase 2 (mitochondrial)                                     | 10 | fatty acid binding protein 7, brain                              | 10 |
| nudix (nucleoside diphosphate linked moiety X)-type motif 6                                   | 10 | proteasome subunit beta 9                                        | 10 |
| nuclear receptor subfamily 1, group D, member 2                                               | 10 | fatty acid binding protein 5, epidermal                          | 10 |
| nuclear receptor subfamily 1, group D, member 1                                               | 10 | insulin-like growth factor binding protein 5                     | 10 |
| glycerol-3-phosphate dehydrogenase 1 (soluble)                                                | 10 | TAR DNA binding protein                                          | 10 |
| brain protein I3                                                                              | 10 | 24-dehydrocholesterol reductase                                  | 10 |
| monocyte to macrophage differentiation-associated                                             | 10 | ubiquitin-conjugating enzyme E2H                                 | 10 |
| rhomboid domain containing 2                                                                  | 10 | ornithine decarboxylase antizyme 1                               | 10 |
| MID1 interacting protein 1                                                                    | 10 | ST3 beta-galactoside alpha-2,3-sialyltransferase 1               | 10 |
| solute carrier family 4, sodium bicarbonate cotransporter, member 4                           | 10 | SKI-like proto-oncogene                                          | 10 |
| aarF domain containing kinase 3                                                               | 10 | uncharacterized LOC100910973                                     | 10 |
| ilvB (bacterial acetolactate synthase)-like                                                   | 10 | oligosaccharyltransferase complex subunit (non-catalytic)        | 10 |
| carbonic anhydrase 14                                                                         | 10 | sorcin                                                           | 10 |
| interleukin 33                                                                                | 10 | family with sequence similarity 213, member A                    | 10 |
| family with sequence similarity 214, member A                                                 | 10 | M phase phosphoprotein 6                                         | 10 |
| asporin /// asporin                                                                           | 10 | Kruppel-like factor 2                                            | 10 |
| acetyl-CoA acyltransferase 2                                                                  | 10 | mesenteric estrogen-dependent adipogenesis                       | 10 |
| solute carrier family 9, subfamily A (NHE3, cation proton antiporter 3), member 3 regulator 1 | 10 | interferon, alpha-inducible protein 27 like 2B                   | 10 |
| t-complex 11, testis-specific-like 2                                                          | 10 | dual-specificity tyrosine-(Y)-phosphorylation regulated kinase 2 | 10 |
| solute carrier family 25, member 42                                                           | 10 | cAMP responsive element modulator                                | 10 |
| schlafen family member 5                                                                      | 10 | related RAS viral (r-ras) oncogene homolog 2                     | 10 |
| nudix (nucleoside diphosphate linked moiety X)-type motif 7                                   | 10 | APEX nuclease (multifunctional DNA repair enzyme) 1              | 10 |
| meteorin, glial cell differentiation regulator-like                                           | 10 | glucose-6-phosphatase, catalytic subunit                         | 10 |
| spectrin, beta, non-erythrocytic 1                                                            | 10 | SH3-domain binding protein 5 (BTK-associated)                    | 10 |
| transmembrane protein 57                                                                      | 10 | progesterone receptor membrane component 2                       | 10 |
| CDC-like kinase 1                                                                             | 10 | hematological and neurological expressed 1                       | 10 |
|                                                                                               |    | chloride intracellular channel 4                                 | 10 |

| Up-regulated in liver                                 | # of overlapped gene probes | Down-regulated in liver                                                                       | # of overlapped gene probes |
|-------------------------------------------------------|-----------------------------|-----------------------------------------------------------------------------------------------|-----------------------------|
| enoyl-CoA delta isomerase 1                           | 8                           | tubulin alpha-1C chain-like /// tubulin, alpha 1A /// tubulin, alpha 1B /// tubulin, alpha 1C | 8                           |
| carnitine palmitoyltransferase 1a, liver              | 8                           | farnesyl diphosphate synthase                                                                 | 8                           |
| P450 (cytochrome) oxidoreductase                      | 8                           | protein kinase C, delta binding protein                                                       | 8                           |
| cytochrome P450, family 7, subfamily a, polypeptide 1 | 8                           | fatty acid synthase                                                                           | 8                           |
| ectonucleotide pyrophosphatase/phosphodiesterase 2    | 8                           | fatty acid synthase                                                                           | 8                           |
| nuclear receptor subfamily 1, group I, member 3       | 8                           | ATP citrate lyase                                                                             | 8                           |
| acyl-CoA thioesterase 12                              | 8                           | insulin induced gene 1                                                                        | 8                           |
| integral membrane transport protein UST4r             | 8                           | cytochrome P450, family 51                                                                    | 8                           |
| serine dehydratase                                    | 8                           | 7-dehydrocholesterol reductase                                                                | 8                           |
| cytochrome P450, family 4, subfamily a, polypeptide 3 | 8                           | aquaporin 8                                                                                   | 8                           |
| 2-hydroxyacyl-CoA lyase 1                             | 8                           | pyruvate kinase, liver and RBC                                                                | 8                           |
| metallothionein 1a /// transthyretin                  | 8                           | catechol-O-methyltransferase                                                                  | 8                           |
| ankyrin repeat domain 46                              | 8                           | arginine vasopressin receptor 1A                                                              | 8                           |

|                                                                                                             |   |                                                                                            |   |
|-------------------------------------------------------------------------------------------------------------|---|--------------------------------------------------------------------------------------------|---|
| rhomboid domain containing 2                                                                                | 8 | malic enzyme 1, NADP(+)-dependent, cytosolic                                               | 8 |
| F-box protein 31                                                                                            | 8 | fatty acid binding protein 5, epidermal                                                    | 8 |
| sideroflexin 1                                                                                              | 8 | epidermal growth factor receptor                                                           | 8 |
| ankyrin repeat and KH domain containing 1 /// eukaryotic translation initiation factor 4E binding protein 3 | 8 | malic enzyme 1, NADP(+)-dependent, cytosolic                                               | 8 |
| indolethylamine N-methyltransferase                                                                         | 8 | lipopolysaccharide-induced TNF factor                                                      | 8 |
| folliculin interacting protein 2                                                                            | 8 | sterol regulatory element binding transcription factor 1                                   | 8 |
| phosphatase domain containing, paladin 1                                                                    | 8 | actin, gamma 1 /// actin, gamma 1 propeptide-like /// POTE ankyrin domain family, member F | 8 |
| cordon-bleu WH2 repeat protein-like 1                                                                       | 8 | tubulin, beta 4B class IVb                                                                 | 8 |
| enoyl CoA hydratase 1, peroxisomal                                                                          | 8 | tubulin, alpha 4A                                                                          | 8 |
| carnitine palmitoyltransferase 2                                                                            | 8 | adiponectin receptor 2                                                                     | 8 |
| carnitine palmitoyltransferase 1a, liver                                                                    | 8 | phosphogluconate dehydrogenase                                                             | 8 |
| aldehyde dehydrogenase 1 family, member A1                                                                  | 8 | spermidine/spermine N1-acetyl transferase 1                                                | 8 |
| flavin containing monooxygenase 1                                                                           | 8 | CKLF-like MARVEL transmembrane domain containing 6                                         | 8 |
| P450 (cytochrome) oxidoreductase                                                                            | 8 | transmembrane protein 97                                                                   | 8 |
| hydroxysteroid (17-beta) dehydrogenase 2                                                                    | 8 | MARVEL domain containing 1                                                                 | 8 |
| N-acetyltransferase 8                                                                                       | 8 | glycerol-3-phosphate acyltransferase, mitochondrial                                        | 8 |
| calponin 3, acidic                                                                                          | 8 | phosphomevalonate kinase                                                                   | 8 |
| metallothionein 2A                                                                                          | 8 | paroxysmal nonkinesigenic dyskinesia                                                       | 8 |
| zinc finger protein 709-like                                                                                | 8 | tubulin, beta 2A class IIa                                                                 | 8 |
| protein phosphatase, Mg2+/Mn2+ dependent, 1K                                                                | 8 | selenocysteine lyase                                                                       | 8 |
| uracil-DNA glycosylase                                                                                      | 8 | pyroglutamyl-peptidase I                                                                   | 8 |
| nuclear receptor subfamily 1, group D, member 2                                                             | 8 | claudin 2                                                                                  | 8 |
| solute carrier family 16, member 12                                                                         | 8 | acyl-CoA synthetase short-chain family member 2                                            | 8 |
| glycerophosphodiester phosphodiesterase 1                                                                   | 8 | caseinolytic mitochondrial matrix peptidase chaperone subunit                              | 8 |
|                                                                                                             |   | YEATS domain containing 4                                                                  | 8 |
|                                                                                                             |   | sigma non-opioid intracellular receptor 1                                                  | 8 |
|                                                                                                             |   | solute carrier family 16 (monocarboxylate transporter), member 1                           | 8 |
|                                                                                                             |   | glucokinase                                                                                | 8 |
|                                                                                                             |   | sterol regulatory element binding transcription factor 1                                   | 8 |
|                                                                                                             |   | COMM domain containing 6                                                                   | 8 |
|                                                                                                             |   | insulin induced gene 2                                                                     | 8 |
|                                                                                                             |   | transmembrane protein 140                                                                  | 8 |
|                                                                                                             |   | perilipin 2                                                                                | 8 |

| Up-regulated in adipose                                                                          | # of overlapped gene probes | Down-regulated in adipose                                                                                                                                                                                                                                                     | # of overlapped gene probes |
|--------------------------------------------------------------------------------------------------|-----------------------------|-------------------------------------------------------------------------------------------------------------------------------------------------------------------------------------------------------------------------------------------------------------------------------|-----------------------------|
| glutamate-ammonia ligase                                                                         | 8                           | clusterin                                                                                                                                                                                                                                                                     | 8                           |
| carnitine palmitoyltransferase 1b, muscle                                                        | 8                           | secretory leukocyte peptidase inhibitor                                                                                                                                                                                                                                       | 8                           |
| diacylglycerol O-acyltransferase 1                                                               | 8                           | 7-dehydrocholesterol reductase                                                                                                                                                                                                                                                | 8                           |
| carbonyl reductase 1 /// inducible carbonyl reductase-like /// carbonyl reductase [NADPH] 1-like | 8                           | deoxyribonuclease 1-like 3                                                                                                                                                                                                                                                    | 8                           |
| P450 (cytochrome) oxidoreductase                                                                 | 8                           | lysozyme 2                                                                                                                                                                                                                                                                    | 8                           |
| steroidogenic acute regulatory protein                                                           | 8                           | AHA1, activator of heat shock 90kDa protein ATPase homolog 1 (yeast)                                                                                                                                                                                                          | 8                           |
| phosphodiesterase 3B, cGMP-inhibited                                                             | 8                           | tubulin, beta 2A class IIa                                                                                                                                                                                                                                                    | 8                           |
| coagulation factor III (thromboplastin, tissue factor)                                           | 8                           | milk fat globule-EGF factor 8 protein                                                                                                                                                                                                                                         | 8                           |
| melanoma cell adhesion molecule                                                                  | 8                           | ficolin A                                                                                                                                                                                                                                                                     | 8                           |
| isocitrate dehydrogenase 1 (NADP+), soluble                                                      | 8                           | transferrin receptor                                                                                                                                                                                                                                                          | 8                           |
| optineurin                                                                                       | 8                           | heat shock 105/110 protein 1                                                                                                                                                                                                                                                  | 8                           |
| protein kinase, cAMP dependent regulatory, type II beta                                          | 8                           | macrophage expressed 1                                                                                                                                                                                                                                                        | 8                           |
| monocyte to macrophage differentiation-associated                                                | 8                           | patatin-like phospholipase domain containing 3                                                                                                                                                                                                                                | 8                           |
| paternally expressed 3                                                                           | 8                           | Fc fragment of IgG, low affinity IIa, receptor /// low affinity immunoglobulin gamma Fc region receptor III-like /// low affinity immunoglobulin gamma Fc region receptor III /// low affinity immunoglobulin gamma Fc region receptor III-like /// Fc gamma receptor II beta | 8                           |
| aarF domain containing kinase 3                                                                  | 8                           |                                                                                                                                                                                                                                                                               |                             |
| tetraspanin-4-like /// tetraspanin 4                                                             | 8                           |                                                                                                                                                                                                                                                                               |                             |
| ilvB (bacterial acetolactate synthase)-like                                                      | 8                           |                                                                                                                                                                                                                                                                               |                             |
| transmembrane protein 120A                                                                       | 8                           |                                                                                                                                                                                                                                                                               |                             |
| CTD (carboxy-terminal domain, RNA polymerase II, polypeptide A) small phosphatase-like           | 8                           |                                                                                                                                                                                                                                                                               |                             |
| 1-acylglycerol-3-phosphate O-acyltransferase 2                                                   | 8                           |                                                                                                                                                                                                                                                                               |                             |
| retinol binding protein 7, cellular                                                              | 8                           |                                                                                                                                                                                                                                                                               |                             |
| asparaginase like 1                                                                              | 8                           |                                                                                                                                                                                                                                                                               |                             |
| melanoma cell adhesion molecule                                                                  | 8                           |                                                                                                                                                                                                                                                                               |                             |
| sorbin and SH3 domain containing 1                                                               | 8                           |                                                                                                                                                                                                                                                                               |                             |

|                                                            |   |
|------------------------------------------------------------|---|
| peroxisomal biogenesis factor 1                            | 8 |
| salt-inducible kinase 2                                    | 8 |
| mitochondrial amidoxime reducing component 1               | 8 |
| mitochondrial amidoxime reducing component 1               | 8 |
| glutamate-ammonia ligase                                   | 8 |
| regulator of G-protein signaling 2                         | 8 |
| P450 (cytochrome) oxidoreductase                           | 8 |
| lipase, hormone sensitive                                  | 8 |
| steroidogenic acute regulatory protein                     | 8 |
| potassium channel, two pore domain subfamily K, member 3   | 8 |
| programmed cell death 4                                    | 8 |
| epoxide hydrolase 1, microsomal (xenobiotic)               | 8 |
| BCL2/adenovirus E1B interacting protein 3                  | 8 |
| D site of albumin promoter (albumin D-box) binding protein | 8 |
| asparaginase like 1                                        | 8 |
| gamma-aminobutyric acid (GABA) B receptor 1                | 8 |
| acyl-CoA synthetase long-chain family member 1             | 8 |
| optineurin                                                 | 8 |
| nicotinamide phosphoribosyltransferase                     | 8 |
| CTP synthase 2                                             | 8 |
| potassium channel, two pore domain subfamily K, member 3   | 8 |

| Up-regulated in muscle                                                                                                 | # of overlapped gene probes | Down-regulated in muscle                                                                                                                  | # of overlapped gene probes |
|------------------------------------------------------------------------------------------------------------------------|-----------------------------|-------------------------------------------------------------------------------------------------------------------------------------------|-----------------------------|
| CD36 molecule (thrombospondin receptor) /// scavenger receptor class B, member 2-like                                  | 8                           | glycine amidinotransferase (L-arginine:glycine amidinotransferase)                                                                        | 8                           |
| nuclear factor, erythroid 2-like 2                                                                                     | 8                           | HOP homeobox                                                                                                                              | 8                           |
| interleukin 15                                                                                                         | 8                           | fatty acid desaturase 1                                                                                                                   | 8                           |
| synaptojanin 2                                                                                                         | 8                           | nuclear factor, interleukin 3 regulated                                                                                                   | 8                           |
| pyruvate dehydrogenase kinase, isozyme 4                                                                               | 8                           | myosin binding protein H                                                                                                                  | 8                           |
| thyrotrophic embryonic factor                                                                                          | 8                           | phosphodiesterase 4B, cAMP specific                                                                                                       | 8                           |
| xanthine dehydrogenase                                                                                                 | 8                           | insulin-like growth factor binding protein 5                                                                                              | 8                           |
| sulfotransferase family 1A member 1                                                                                    | 8                           | tumor necrosis factor receptor superfamily, member 12a                                                                                    | 8                           |
| nuclear receptor subfamily 1, group D, member 2                                                                        | 8                           | CKLF-like MARVEL transmembrane domain containing 6                                                                                        | 8                           |
| solute carrier family 38, member 3                                                                                     | 8                           | related RAS viral (r-ras) oncogene homolog 2                                                                                              | 8                           |
| spectrin, beta, non-erythrocytic 1                                                                                     | 8                           | ST3 beta-galactoside alpha-2,3-sialyltransferase 1                                                                                        | 8                           |
| diacylglycerol O-acyltransferase 2                                                                                     | 8                           | anoctamin 6                                                                                                                               | 8                           |
| MID1 interacting protein 1                                                                                             | 8                           | actin filament associated protein 1-like 1                                                                                                | 8                           |
| four and a half LIM domains 3                                                                                          | 8                           | G protein-coupled receptor, class C, group 5, member C                                                                                    | 8                           |
| zinc finger protein 703                                                                                                | 8                           | WD repeat and SOCS box-containing 1                                                                                                       | 8                           |
| pericentrin                                                                                                            | 8                           | sideroflexin 5                                                                                                                            | 8                           |
| sphingomyelin synthase 1                                                                                               | 8                           | tight junction associated protein 1                                                                                                       | 8                           |
| pleckstrin homology-like domain, family A, member 3                                                                    | 8                           | mesenteric estrogen-dependent adipogenesis                                                                                                | 8                           |
| ubiquitin specific peptidase 2                                                                                         | 8                           | popeye domain containing 2                                                                                                                | 8                           |
| ubiquitin specific peptidase 2                                                                                         | 8                           | ring finger protein 2                                                                                                                     | 8                           |
| cysteine rich transmembrane BMP regulator 1 (chordin like)                                                             | 8                           | dual-specificity tyrosine-(Y)-phosphorylation regulated kinase 2                                                                          | 8                           |
| sphingomyelin synthase 1                                                                                               | 8                           | tetratricopeptide repeat domain 7A                                                                                                        | 8                           |
| scavenger receptor class A, member 5                                                                                   | 8                           | nicotinamide riboside kinase 2                                                                                                            | 8                           |
| inositol polyphosphate-4-phosphatase, type II                                                                          | 8                           | cytokine inducible SH2-containing protein                                                                                                 | 8                           |
| ADP-ribosyltransferase 1                                                                                               | 8                           | cAMP responsive element modulator                                                                                                         | 8                           |
| zinc finger protein 503                                                                                                | 8                           | autism susceptibility candidate 2-like                                                                                                    | 8                           |
| CD36 molecule (thrombospondin receptor) /// scavenger receptor class B, member 2-like /// platelet glycoprotein 4-like | 8                           | solute carrier family 16, member 9                                                                                                        | 8                           |
| carnitine palmitoyltransferase 1a, liver                                                                               | 8                           | protein tyrosine phosphatase, non-receptor type 4                                                                                         | 8                           |
| flavin containing monooxygenase 1                                                                                      | 8                           | ring finger protein 2                                                                                                                     | 8                           |
| guanine deaminase                                                                                                      | 8                           | v-maf avian musculoaponeurotic fibrosarcoma oncogene homolog                                                                              | 8                           |
| epoxide hydrolase 1, microsomal (xenobiotic)                                                                           | 8                           | dual-specificity tyrosine-(Y)-phosphorylation regulated kinase 2                                                                          | 8                           |
| ubiquitin specific peptidase 2                                                                                         | 8                           | dual-specificity tyrosine-(Y)-phosphorylation regulated kinase 2                                                                          | 8                           |
| D site of albumin promoter (albumin D-box) binding protein                                                             | 8                           | v-maf avian musculoaponeurotic fibrosarcoma oncogene homolog                                                                              | 8                           |
| phosphoinositide-3-kinase interacting protein 1                                                                        | 8                           | SH3-domain binding protein 5 (BTK-associated)                                                                                             | 8                           |
| actin-binding LIM protein 1                                                                                            | 8                           | G0/G1switch 2                                                                                                                             | 8                           |
| solute carrier family 25, member 42                                                                                    | 8                           | heat shock protein 90, alpha (cytosolic), class A member 1 /// heat shock protein HSP 90-alpha /// similar to heat shock protein 1, alpha | 8                           |
| nudix (nucleoside diphosphate linked moiety X)-type motif 7                                                            | 8                           | PX domain containing 1                                                                                                                    | 8                           |
| nuclear receptor subfamily 1, group D, member 2                                                                        | 8                           | clock circadian regulator                                                                                                                 | 8                           |
| Rho GTPase activating protein 12                                                                                       | 8                           | transmembrane protein 100                                                                                                                 | 8                           |
| cysteine rich transmembrane BMP regulator 1 (chordin like)                                                             | 8                           | PWWP domain containing 2B                                                                                                                 | 8                           |
| zinc finger protein 503                                                                                                | 8                           | dual-specificity tyrosine-(Y)-phosphorylation regulated kinase 2                                                                          | 8                           |
| peroxisome proliferator-activated receptor gamma, coactivator 1 alpha                                                  | 8                           | clock circadian regulator                                                                                                                 | 8                           |

|                                                            |   |                                                               |   |
|------------------------------------------------------------|---|---------------------------------------------------------------|---|
| nicotinamide phosphoribosyltransferase                     | 8 | TEA domain family member 4                                    | 8 |
| adhesion G protein-coupled receptor F5                     | 8 | similar to RIKEN cDNA D930015E06                              | 8 |
| cysteine rich transmembrane BMP regulator 1 (chordin like) | 8 | immunity-related GTPase family, M                             | 8 |
|                                                            |   | melanoma associated antigen (mutated) 1-like 1                | 8 |
|                                                            |   | akirin 1                                                      | 8 |
|                                                            |   | solute carrier family 41, member 3                            | 8 |
|                                                            |   | uncharacterized LOC102554645 /// uncharacterized LOC103693891 | 8 |
|                                                            |   | protein phosphatase 2, regulatory subunit B', alpha           | 8 |

| Up-regulated in brain(hypothalamus) | # of overlapped gene probes | Down-regulated in brain(hypothalamus)           | # of overlapped gene probes |
|-------------------------------------|-----------------------------|-------------------------------------------------|-----------------------------|
|                                     |                             | early growth response 1                         | 8                           |
|                                     |                             | nuclear receptor subfamily 4, group A, member 3 | 8                           |

| Up-regulated in intestine                                                                                              | # of overlapped gene probes | Down-regulated in intestine                                                      | # of overlapped gene probes |
|------------------------------------------------------------------------------------------------------------------------|-----------------------------|----------------------------------------------------------------------------------|-----------------------------|
| matrix Gla protein                                                                                                     | 4                           | carbonic anhydrase 2                                                             | 4                           |
| CD36 molecule (thrombospondin receptor) /// scavenger receptor class B, member 2-like                                  | 4                           | ADP-ribosylation factor 5                                                        | 4                           |
| acyl-CoA dehydrogenase, C-4 to C-12 straight chain                                                                     | 4                           | glutaminase                                                                      | 4                           |
| glutathione S-transferase alpha 1 /// glutathione S-transferase alpha-3-like                                           | 4                           | abl-interactor 1                                                                 | 4                           |
| alpha-methylacyl-CoA racemase                                                                                          | 4                           | heat shock 70kD protein 1A /// heat shock 70kD protein 1B (mapped)               | 4                           |
| 2,4-dienoyl CoA reductase 1, mitochondrial                                                                             | 4                           | S100 calcium binding protein G                                                   | 4                           |
| serum/glucocorticoid regulated kinase 1                                                                                | 4                           | regulator of G-protein signaling 4                                               | 4                           |
| claudin 3                                                                                                              | 4                           | neuromedin U                                                                     | 4                           |
| glycoprotein (transmembrane) nmb                                                                                       | 4                           | signal transducer and activator of transcription 3 (acute-phase response factor) | 4                           |
| dipeptidase 1 (renal)                                                                                                  | 4                           | Z-DNA binding protein 1                                                          | 4                           |
| period circadian clock 2                                                                                               | 4                           | 2'-5' oligoadenylate synthetase 1A                                               | 4                           |
| carbonic anhydrase 4                                                                                                   | 4                           | chloride channel accessory 4                                                     | 4                           |
| selenoprotein P, plasma, 1                                                                                             | 4                           | carbonic anhydrase 2                                                             | 4                           |
| fatty acid binding protein 1, liver                                                                                    | 4                           | glucose-6-phosphatase, catalytic subunit                                         | 4                           |
| fatty acid binding protein 2, intestinal                                                                               | 4                           | lipoprotein lipase                                                               | 4                           |
| solute carrier family 15 (oligopeptide transporter), member 1                                                          | 4                           | BTG family, member 2                                                             | 4                           |
| ATP-binding cassette, subfamily G (WHITE), member 5                                                                    | 4                           | alkaline phosphatase 3, intestine, not Mn requiring                              | 4                           |
| solute carrier family 6 (proline IMINO transporter), member 20                                                         | 4                           | heat shock 105/110 protein 1                                                     | 4                           |
| sulfotransferase family 1A member 1                                                                                    | 4                           | vanin 1                                                                          | 4                           |
| angiotensin I converting enzyme /// angiotensin-converting enzyme-like                                                 | 4                           | palladin                                                                         | 4                           |
| peripheral myelin protein 22                                                                                           | 4                           | serine/arginine repetitive matrix 2                                              | 4                           |
| cytochrome P450, family 3, subfamily a, polypeptide 9                                                                  | 4                           | DnaJ (Hsp40) homolog, subfamily A, member 1                                      | 4                           |
| cytochrome P450, family 4, subfamily b, polypeptide 1                                                                  | 4                           |                                                                                  |                             |
| cytochrome P450, family 2, subfamily b, polypeptide 1 /// cytochrome P450, family 2, subfamily b, polypeptide 2        | 4                           |                                                                                  |                             |
| metallothionein 1a /// transthyretin                                                                                   | 4                           |                                                                                  |                             |
| ADP-ribosyltransferase 3                                                                                               | 4                           |                                                                                  |                             |
| CNDP dipeptidase 2 (metallopeptidase M20 family)                                                                       | 4                           |                                                                                  |                             |
| phosphoenolpyruvate carboxykinase 1 (soluble)                                                                          | 4                           |                                                                                  |                             |
| glutamate-cysteine ligase, catalytic subunit                                                                           | 4                           |                                                                                  |                             |
| ankyrin repeat and KH domain containing 1 /// eukaryotic translation initiation factor 4E binding protein 3            | 4                           |                                                                                  |                             |
| Nedd4 family interacting protein 2                                                                                     | 4                           |                                                                                  |                             |
| CLOCK-interacting pacemaker                                                                                            | 4                           |                                                                                  |                             |
| hydroxyprostaglandin dehydrogenase 15 (NAD)                                                                            | 4                           |                                                                                  |                             |
| lectin, galactoside-binding, soluble, 3                                                                                | 4                           |                                                                                  |                             |
| CD36 molecule (thrombospondin receptor) /// scavenger receptor class B, member 2-like /// platelet glycoprotein 4-like | 4                           |                                                                                  |                             |
| histamine N-methyltransferase                                                                                          | 4                           |                                                                                  |                             |
| epoxide hydrolase 1, microsomal (xenobiotic)                                                                           | 4                           |                                                                                  |                             |
| ubiquitin specific peptidase 2                                                                                         | 4                           |                                                                                  |                             |
| solute carrier family 9, subfamily A (NHE3, cation proton antiporter 3), member 3 regulator 1                          | 4                           |                                                                                  |                             |
| D site of albumin promoter (albumin D-box) binding protein                                                             | 4                           |                                                                                  |                             |
| mucin 3, intestinal                                                                                                    | 4                           |                                                                                  |                             |
| metallothionein 2A                                                                                                     | 4                           |                                                                                  |                             |
| chemokine (C-C motif) ligand 6                                                                                         | 4                           |                                                                                  |                             |

|                                                       |   |
|-------------------------------------------------------|---|
| myosin regulatory light chain interacting protein     | 4 |
| transmembrane protein 45b                             | 4 |
| nuclear receptor subfamily 1, group D, member 2       | 4 |
| carnosine dipeptidase 1 (metallopeptidase M20 family) | 4 |
