# Supplementary material for: A Comparison of Gene Expression Profiles of Rat Tissues after Mild and Short-Term Calorie Restrictions
Source: MDPI journal article supplement (doi:10.3390/nu13072277), 2021-06-30
Supplement: s1 [file s1]

**Supplementary Table 1** Number of genes altered by short-term and mild-to-moderate CR

|                         |           |         | 5%   | 10%  | 20%  | 30%  | Overlap† |
|-------------------------|-----------|---------|------|------|------|------|----------|
| liver                   | Up        | 1 week  | 69   | 420  | 613  | 326  | 40       |
|                         |           | 1 month | 347  | 286  | 384  | 363  |          |
|                         | Down      | 1 week  | 114  | 168  | 289  | 408  | 50       |
|                         |           | 1 month | 148  | 168  | 188  | 207  |          |
|                         | Up + Down | 1 week  | 183  | 588  | 902  | 734  | 90       |
|                         |           | 1 month | 495  | 454  | 572  | 570  |          |
|                         |           |         | 5%   | 10%  | 20%  | 30%  | Overlap† |
| adipose                 | Up        | 1 week  | 247  | 585  | 653  | 915  | 45       |
|                         |           | 1 month | 117  | 426  | 800  | 485  |          |
|                         | Down      | 1 week  | 140  | 396  | 431  | 759  | 14       |
|                         |           | 1 month | 187  | 806  | 824  | 770  |          |
|                         | Up + Down | 1 week  | 387  | 981  | 1084 | 1674 | 59       |
|                         |           | 1 month | 304  | 1232 | 1624 | 1255 |          |
|                         |           |         | 5%   | 10%  | 20%  | 30%  | Overlap† |
| muscle                  | Up        | 1 week  | 365  | 363  | 588  | 672  | 50       |
|                         |           | 1 month | 496  | 565  | 525  | 690  |          |
|                         | Down      | 1 week  | 319  | 300  | 641  | 845  | 51       |
|                         |           | 1 month | 545  | 532  | 549  | 732  |          |
|                         | Up + Down | 1 week  | 684  | 663  | 1229 | 1517 | 101      |
|                         |           | 1 month | 1041 | 1097 | 1074 | 1422 |          |
|                         |           |         | 5%   | 10%  | 20%  | 30%  | Overlap† |
| brain<br>(hypothalamus) | Up        | 1 week  | 350  | 417  | 433  | 349  | 0        |
|                         |           | 1 month | 59   | 37   | 8    | 69   |          |
|                         | Down      | 1 week  | 996  | 996  | 996  | 996  | 3        |
|                         |           | 1 month | 17   | 21   | 111  | 79   |          |
|                         | Up + Down | 1 week  | 1346 | 1413 | 1429 | 1345 | 3        |
|                         |           | 1 month | 76   | 58   | 119  | 148  |          |
|                         |           |         | 5%   | 10%  | 20%  | 30%  | Overlap† |
| intestine               | Up        | 1 week  | -    | -    | -    | -    | 47       |
|                         |           | 1 month | 284  | 293  | 214  | 425  |          |
|                         | Down      | 1 week  | -    | -    | -    | -    | 23       |
|                         |           | 1 month | 86   | 210  | 316  | 133  |          |
|                         | Up + Down | 1 week  | -    | -    | -    | -    | 70       |
|                         |           | 1 month | 370  | 503  | 530  | 558  |          |

† The number of gene probes overlapped in the same direction throughout all the CR groups. The values were determined according to the criteria described in Materials and methods. 5%: 5% calorie restriction. 10%: 10% calorie restriction. 20%: 20% calorie restriction. 30%: 30% calorie restriction.
