# Supplementary material for: A Comparison of Gene Expression Profiles of Rat Tissues after Mild and Short-Term Calorie Restrictions
Source: MDPI journal article supplement (doi:10.3390/nu13072277), 2021-06-30
Supplement: s1 [file s1]

**Supplementary Table 6** The comparison of the top five genes consistently up- or down- regulated for each organ with meta-analysis data

|          | Gene Symbol       | Our Study | Ref #1 | Ref #2 |
|----------|-------------------|-----------|--------|--------|
| liver    | Mt2A              | up        |        | up     |
|          | Mt1a /// Ttr      | up        |        | up     |
|          | Nat8              | up        | up     |        |
|          | Hsd17b2           | up        | up     |        |
|          | Por               | up        | up     | up     |
| adipose  | Tubb2a            | down      |        | down   |
|          | Me1               | down      |        | down   |
|          | Acly              | down      | down   |        |
|          | Dbp               | up        | up     | down   |
|          | Dhcr7             | down      | down   |        |
| muscle   | Fmo1              | up        |        | up     |
|          | Sult1a1           | up        | up     | up     |
|          | G0s2              | down      | down   |        |
| brain    | Egr1              | down      |        | down   |
| intestin | Sult1a1           | up        | up     | up     |
|          | Per2              | up        | up     | up     |
|          | Abcg5             | up        | up     |        |
|          | Hspa1a /// Hspa1b | down      |        | down   |
