# Supplementary material for: A Comparison of Gene Expression Profiles of Rat Tissues after Mild and Short-Term Calorie Restrictions
Source: Nutrients. 2021 Jun 30;13(7):2277. doi: 10.3390/nu13072277 (PMC8308279; doi:10.3390/nu13072277)
Supplement: Supplementary file 1 [file nutrients-13-02277-s001.zip]

Archive with 5 entries (5 files):
- Table S1.pdf
- Table S2&S3.pdf
- Table S4.pdf
- Table S5.pdf
- Table S6.pdf
